# Supplementary material for: Lithium calix[4]arenes: structural studies and use in the ring opening polymerization of cyclic esters
Source: Royal Society of Chemistry journal article supplement (doi:10.1039/d1ra00175b), 2021-01-01
Supplement: d1ra00175b1.pdf [file d1ra00175b1.pdf]

## Electronic Supplementary Information

### Lithium calix[4]arenes: structural studies and use in the ring opening polymerization of cyclic esters.

Orlando Santoro,<sup>a</sup> Mark R. J. Elsegood,<sup>b</sup> Simon J. Teat,<sup>c</sup> Takehiko Yamato<sup>d</sup> and Carl Redshaw<sup>a\*</sup>

<sup>a</sup> *Plastics Collaboratory, Department of Chemistry, University of Hull, Cottingham Road, Hull, HU6 7RX, UK.*

<sup>b</sup> *Chemistry Department, Loughborough University, Loughborough, Leicestershire, LE11 3TU, UK.*

<sup>c</sup> *Advanced Light Source, Berkeley National Laboratory, 1 Cyclotron Road, Berkeley, California 94720, USA.*

<sup>d</sup> *Department of Applied Chemistry, Faculty of Science and Engineering, Saga University, Honjo-machi, 840-8502, Saga-shi, Japan.*

#### Contents

##### *Crystallography*

**Figure S1.** An alternative view of the core of **1·5THF**

**Figure S2.** Core of **2·5THF**

**Figure S3.** An alternative view of **3·8THF**

**Figure S4.** Layers in the *b/c* plane for **3·8THF**

**Figure S5.** Single molecule of **7·3THF·hexane**

##### *ROP Studies*

**Figure S6.** <sup>1</sup>H NMR (CDCl<sub>3</sub>, 400 MHz, 298 K) spectrum of the PCL synthesized in Table 2 entry 6

**Figure S7.** MALDI-ToF spectrum of the PCL synthesized in Table 2, entry 7.

**Figure S8.**  $^1\text{H}$  NMR ( $\text{CDCl}_3$ , 400 MHz, 298 K) spectrum of the PVL synthesized in Table 3 entry 4.

**Figure S9.** MALDI-ToF spectrum of the PVL synthesized in table 3, entry 4. Main population corresponding to  $\alpha,\omega$ -OH-terminated linear polymers.

**Figure S10.** MALDI-ToF spectrum of the PVL synthesized in table 3, entry 4. Minor population accountable to cyclic species.

**Figure S11.** MALDI-ToF spectrum of the PVL synthesized in table 3, entry 4. Na-adducts of the linear fragments.

**Figure S12.** 2D  $J$ -resolved  $^1\text{H}$  NMR ( $\text{CDCl}_3$ , 400 MHz, 298 K) spectrum of the PLA synthesized with **1** (Table 4, run 1).

**Figure S13.** 2D  $J$ -resolved  $^1\text{H}$  NMR ( $\text{CDCl}_3$ , 400 MHz, 298 K) spectrum of the PLA synthesized with **6** (Table 4, run 5).

**Figure S14.** 2D  $J$ -resolved  $^1\text{H}$  NMR ( $\text{CDCl}_3$ , 400 MHz, 298 K) spectrum of the PLA synthesized with **8** (Table 4, run 7).

**Figure S15.** MALDI-ToF spectrum of the PLA synthesized in Table 4, entry 5.

**Figure S16.**  $^1\text{H}$  NMR ( $\text{CDCl}_3$ , 400 MHz, 298 K) spectrum of the crude reaction mixture of the attempted CL/LA copolymerization with **8** (Table 5, run 7) showing unreacted  $\epsilon$ -CL, 83%  $r$ -LA conversion.

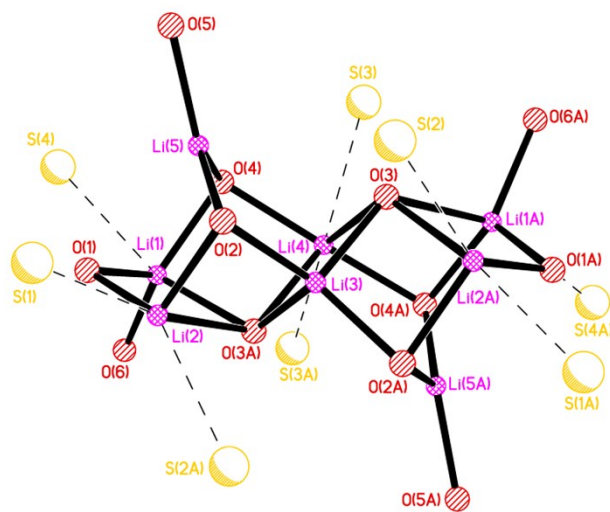

**Figure S1.** An alternative view of the core of **1·5THF**

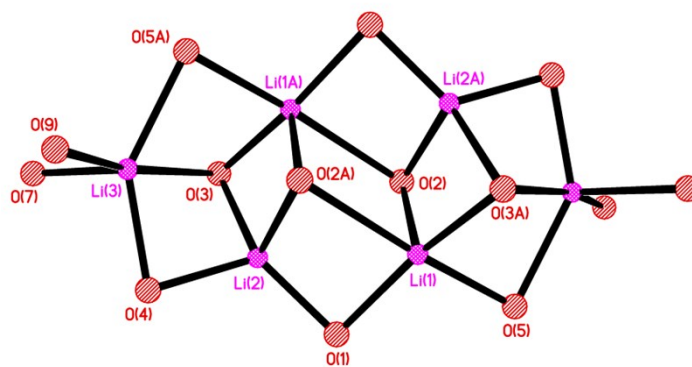

**Figure S2.** Core of **2·5THF**

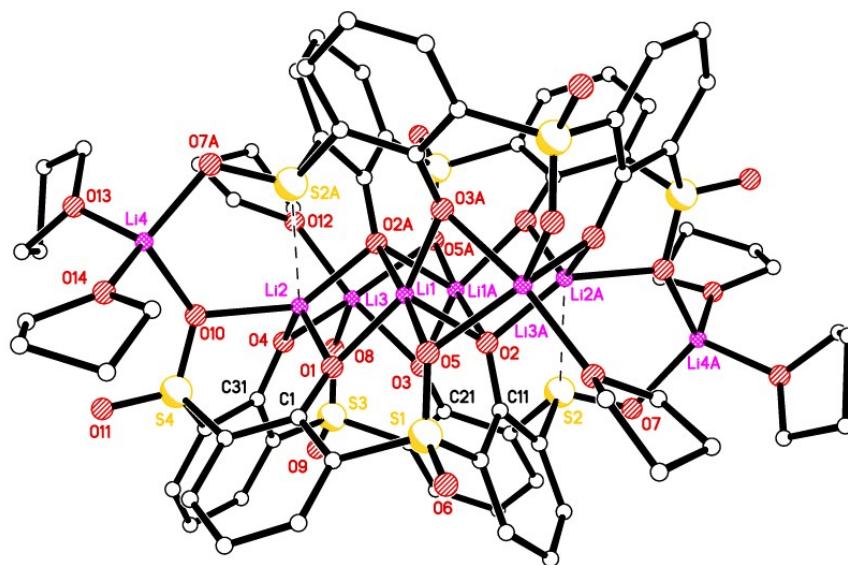

Figure S3. An alternative view of 3·8THF

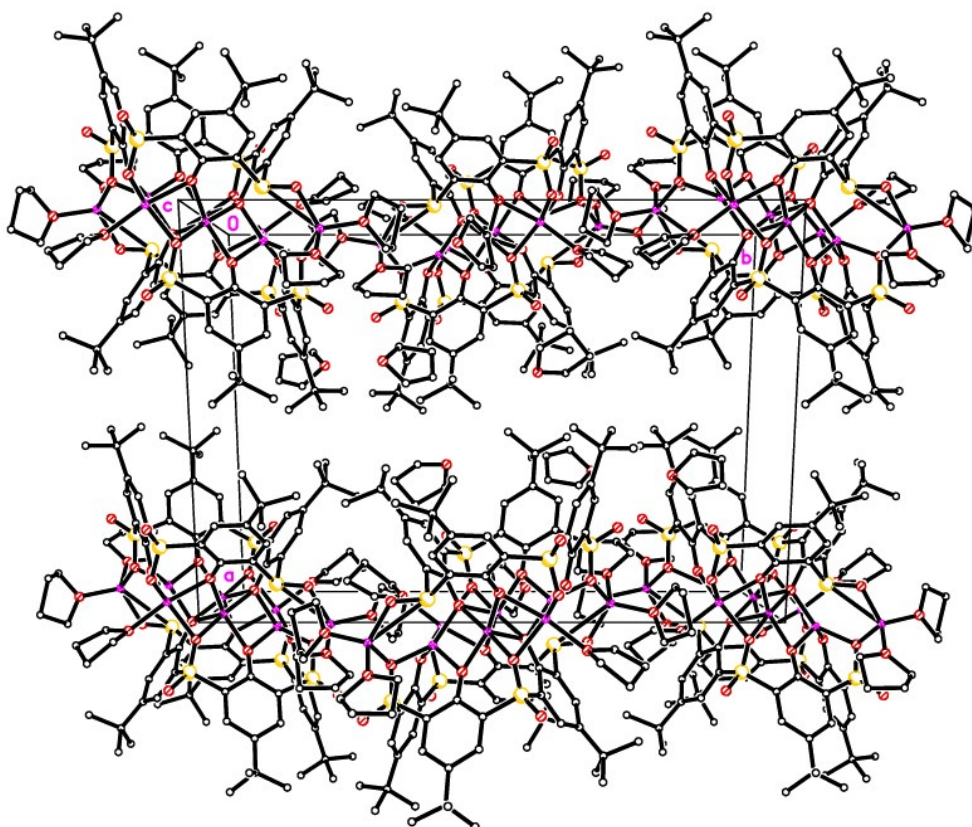

Figure S4. Layers in the *b/c* plane for 3·8THF

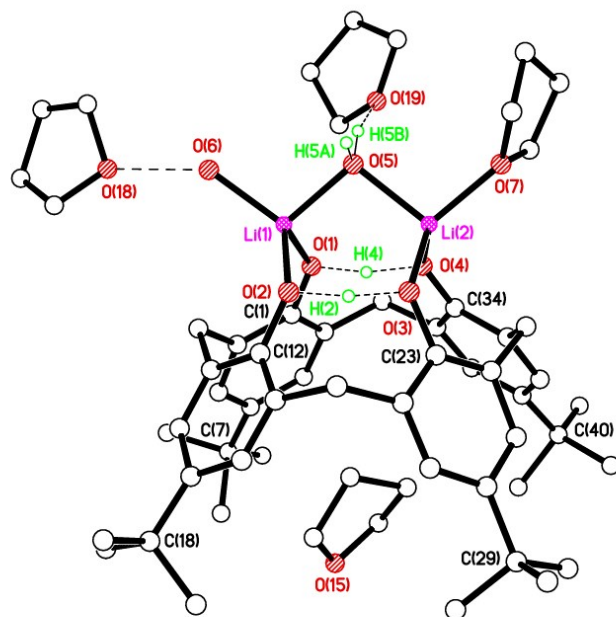

**Figure S5.** Single molecule of 7·3THF·hexane.

*ROP Studies*

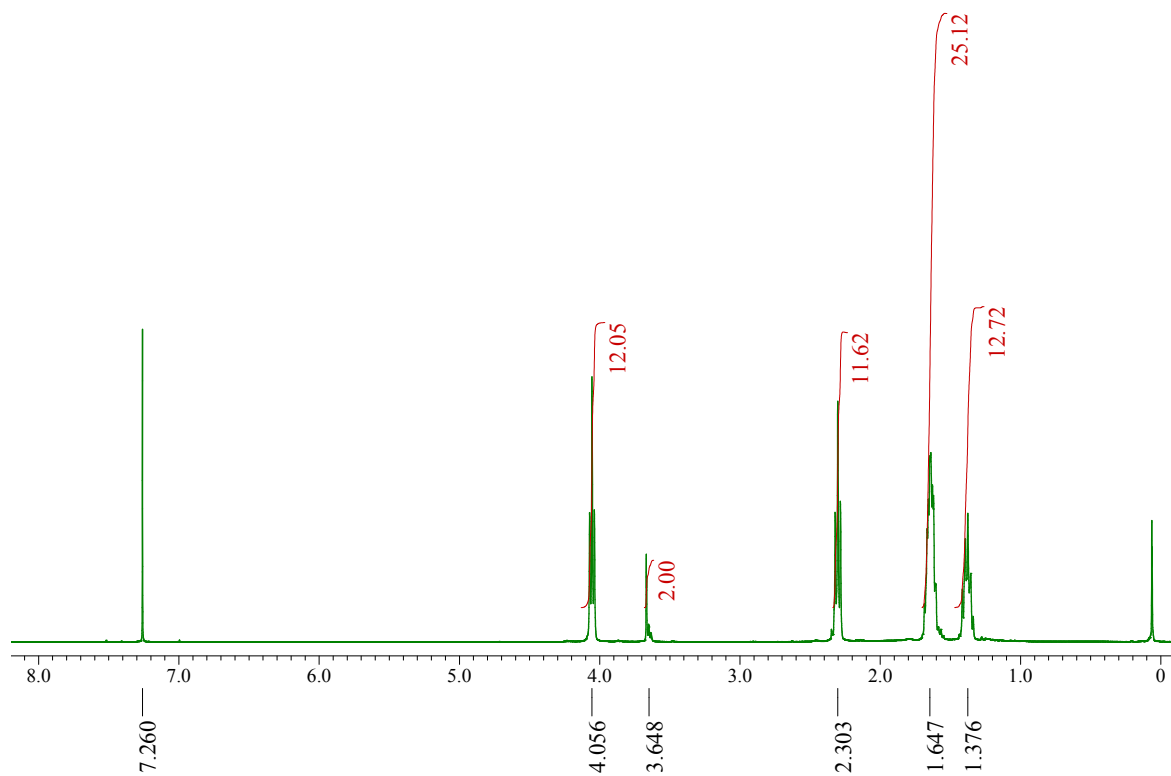

**Figure S6.**  $^1\text{H}$  NMR ( $\text{CDCl}_3$ , 400 MHz, 298 K) spectrum of the PCL synthesized in Table 2 entry 7.

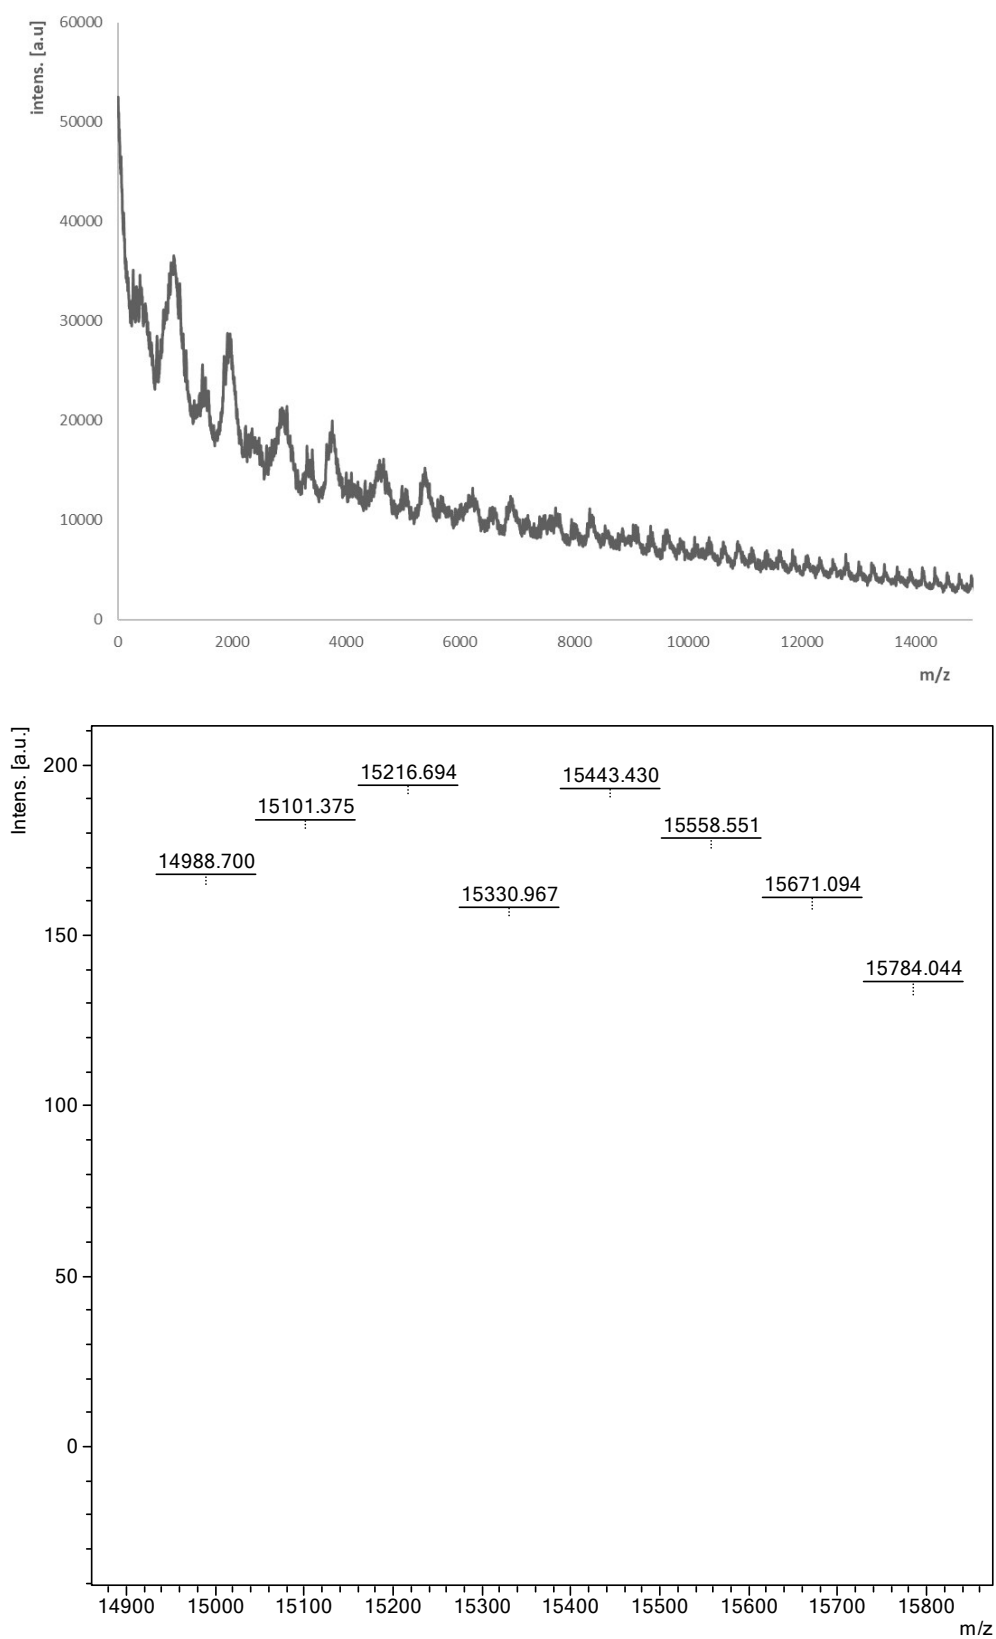

**Figure S7.** MALDI-ToF spectrum of the PCL synthesized in Table 2, entry 7.

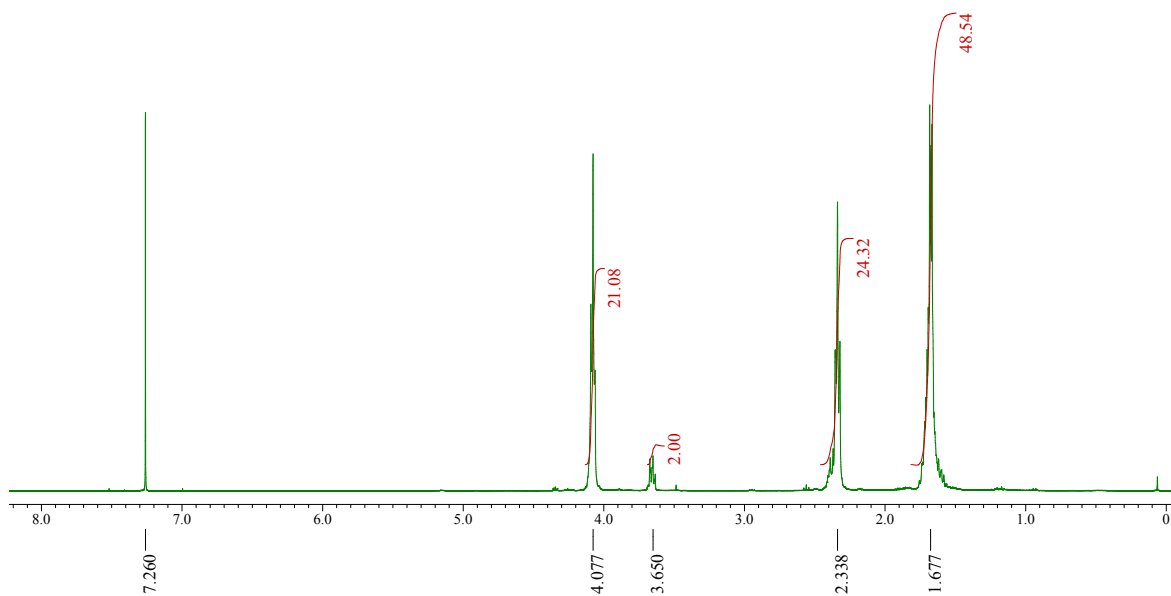

**Figure S8.** <sup>1</sup>H NMR (CDCl<sub>3</sub>, 400 MHz, 298 K) spectrum of the PVL synthesized in Table 3 entry 4.

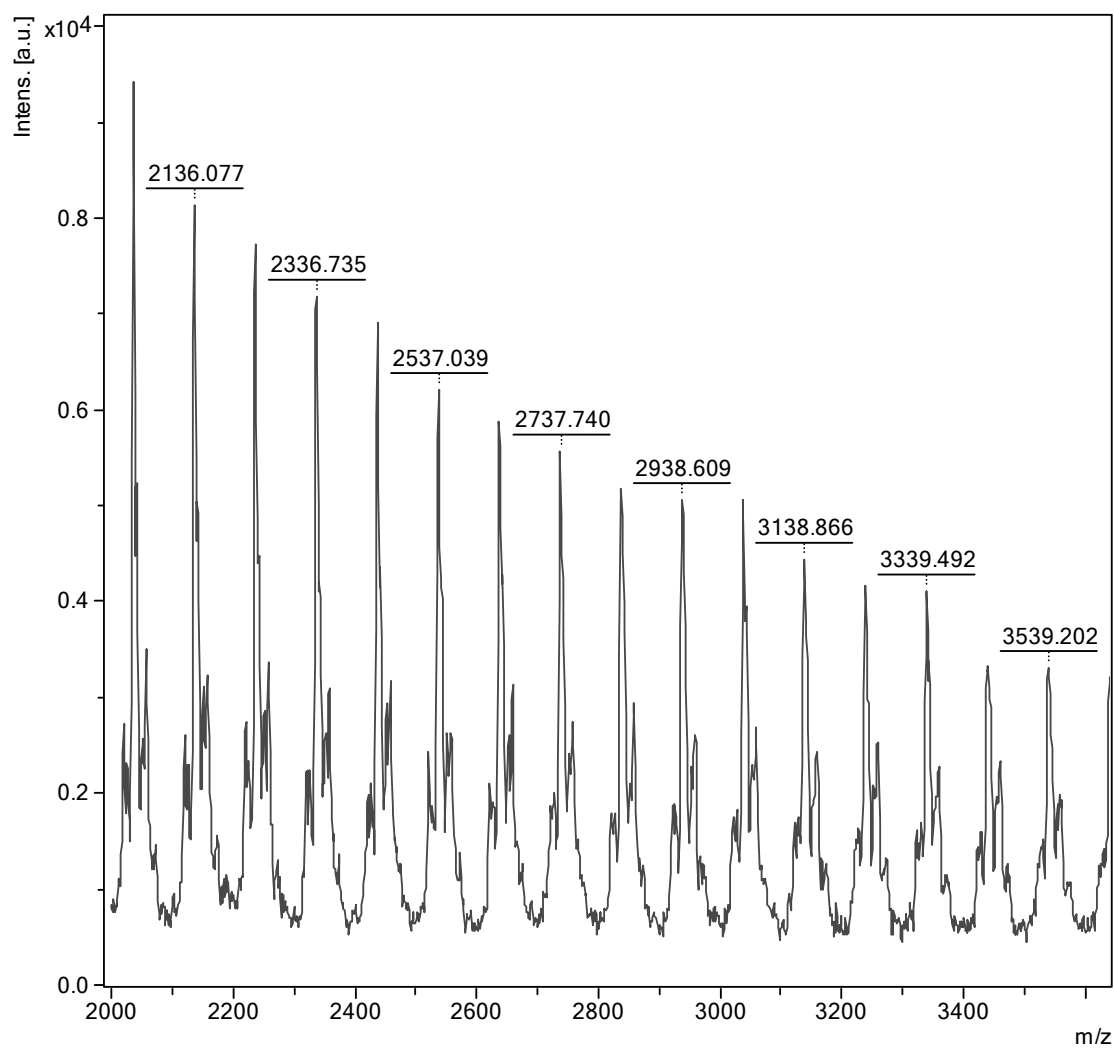

**Figure S9.** MALDI-TOF spectrum of the PVL synthesized in table 3, entry 4. Main population corresponding to  $\alpha,\omega$ -OH-terminated linear polymers;



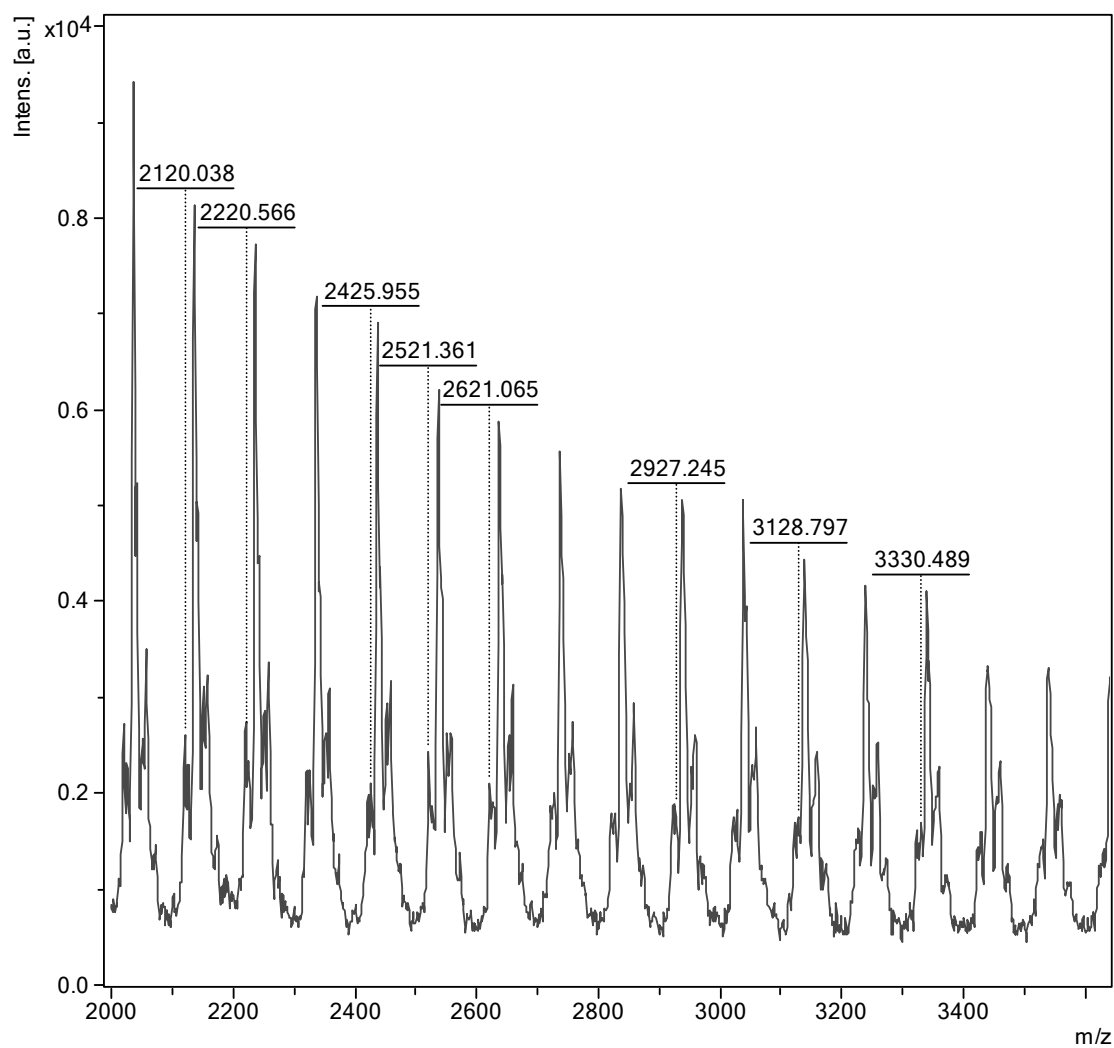

**Figure S10.** MALDI-TOF spectrum of the PVL synthesized in table 3, entry 4. Minor population accountable to cyclic species

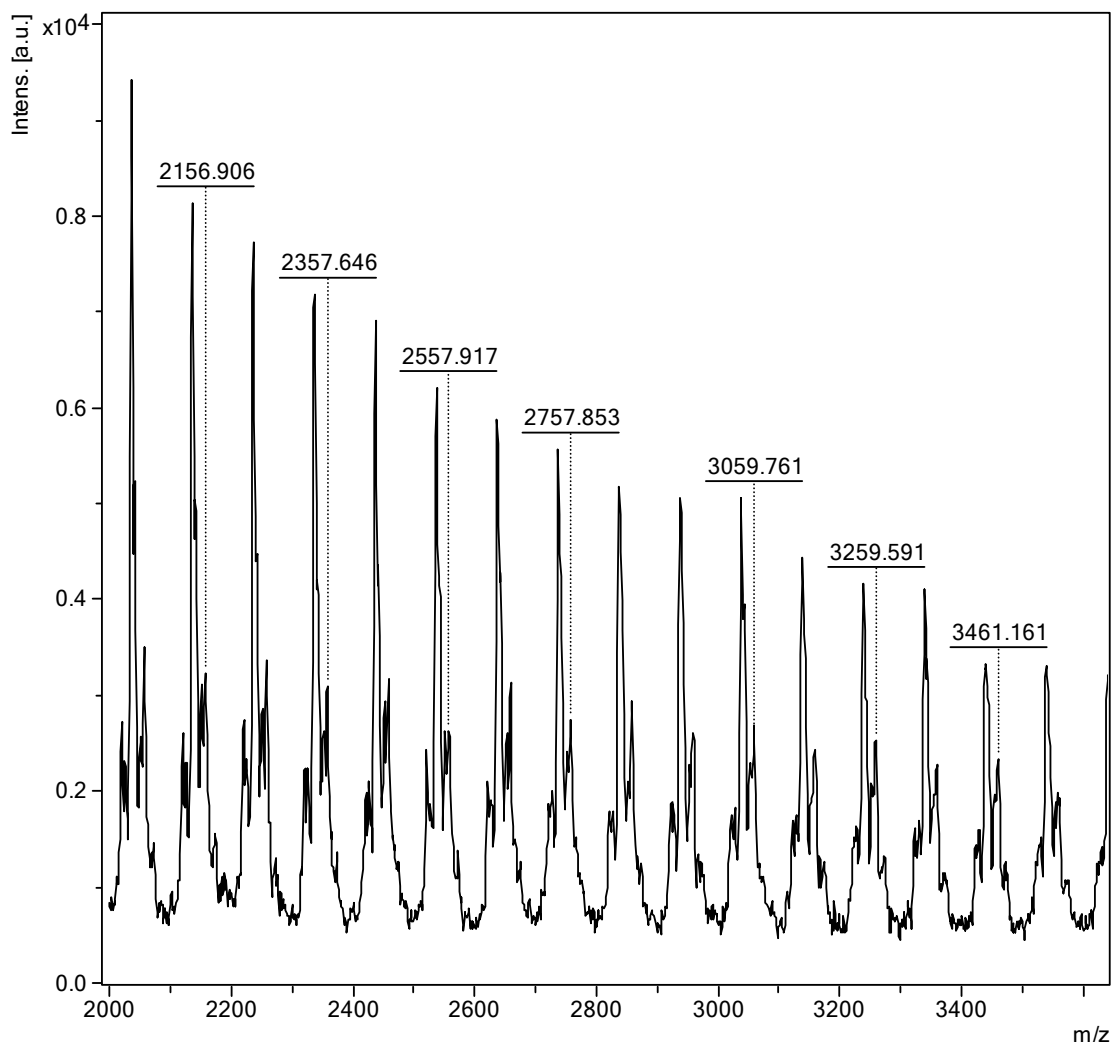

**Figure S11.** MALDI-TOF spectrum of the PVL synthesized in table 3, entry 4. Na-adducts of the linear fragments.

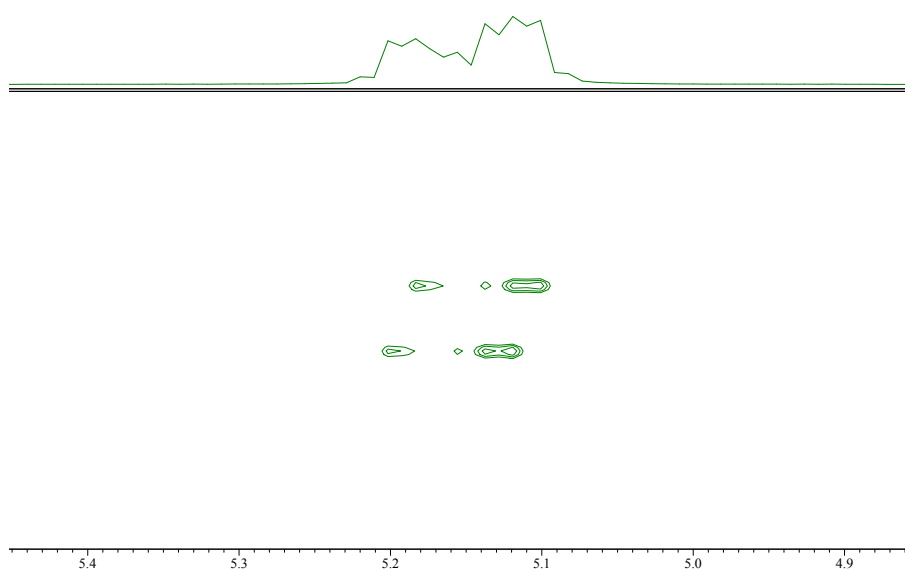

**Figure S12.** 2D *J*-resolved  $^1\text{H}$  NMR ( $\text{CDCl}_3$ , 400 MHz, 298 K) spectrum of the PLA synthesized with **1** (Table 4, run 1).

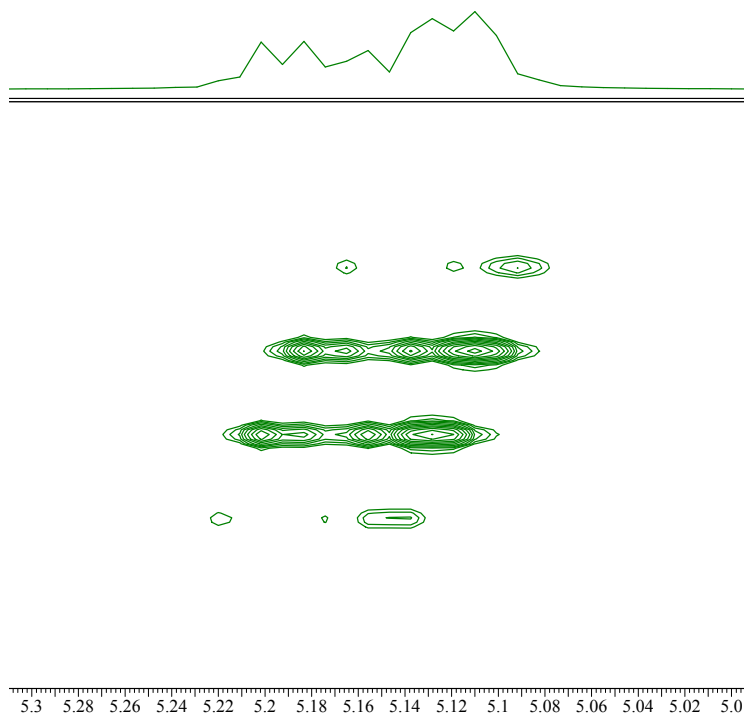

**Figure S13.** 2D *J*-resolved  $^1\text{H}$  NMR ( $\text{CDCl}_3$ , 400 MHz, 298 K) spectrum of the PLA synthesized with **6** (Table 4, run 5).

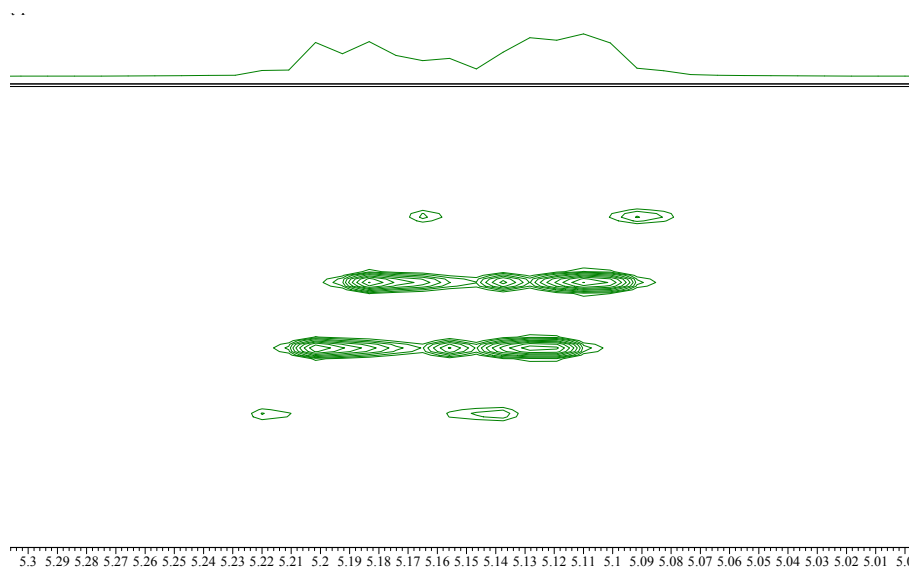

**Figure S14.** 2D *J*-resolved  $^1\text{H}$  NMR ( $\text{CDCl}_3$ , 400 MHz, 298 K) spectrum of the PLA synthesized with **8** (Table 4, run 7).

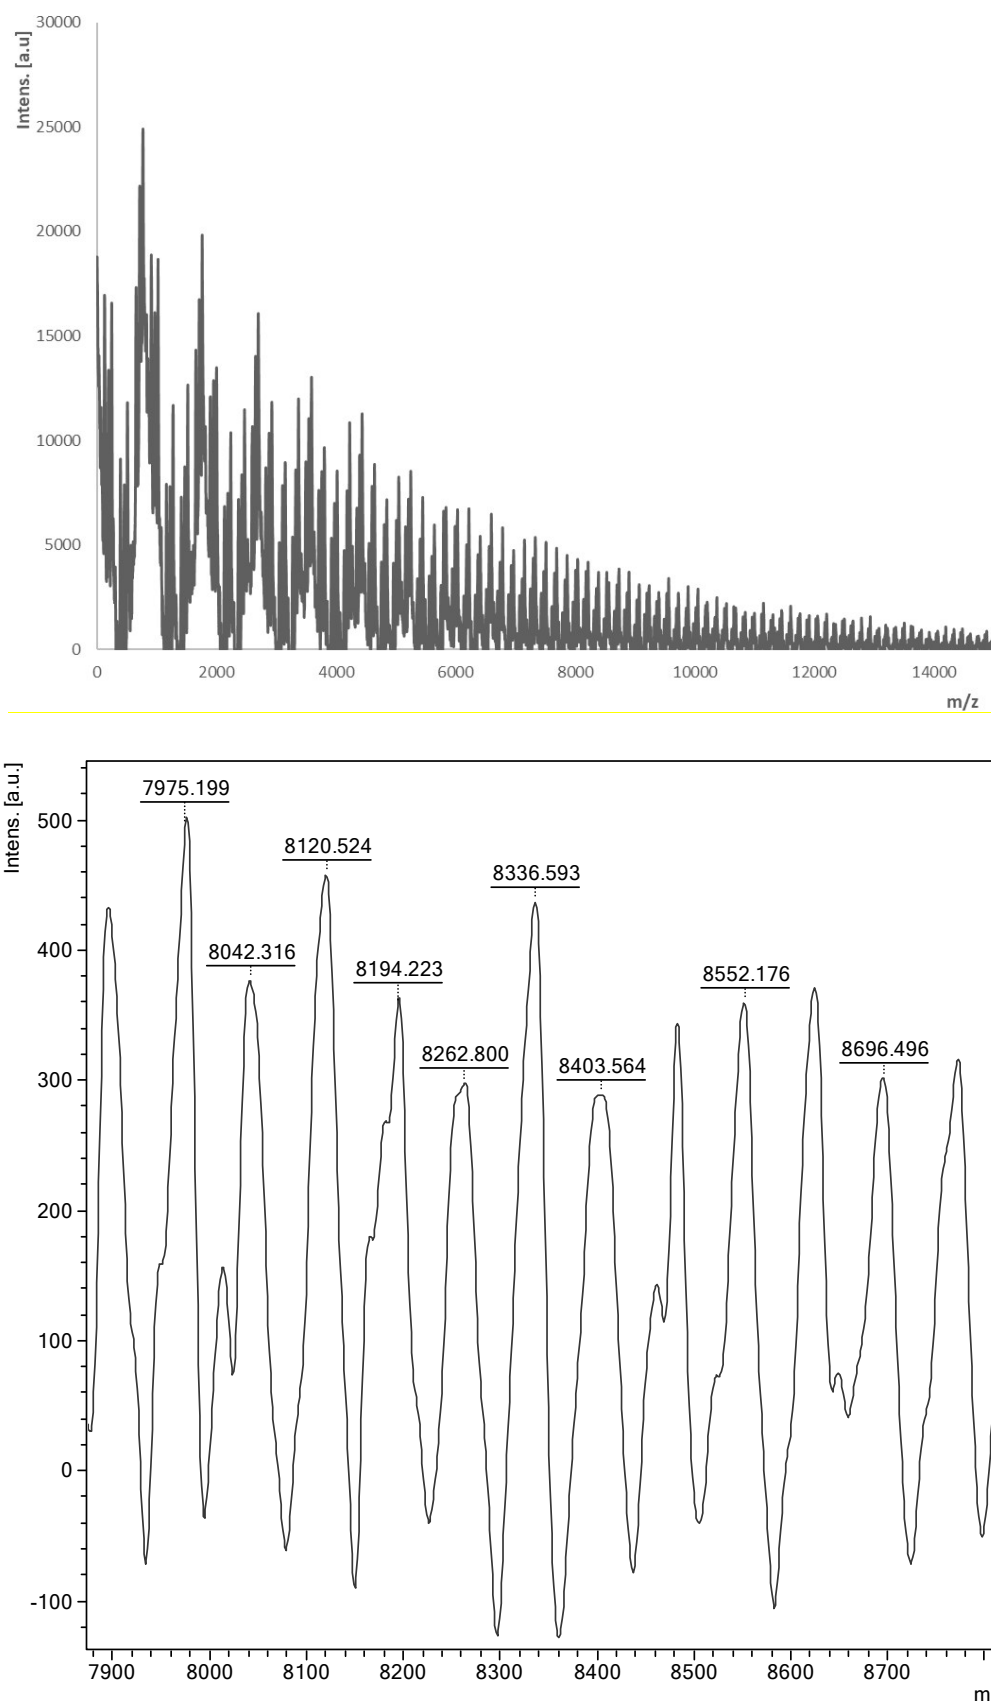

**Figure S15.** MALDI-ToF spectrum of the PLA synthesized in Table 4, entry 5.

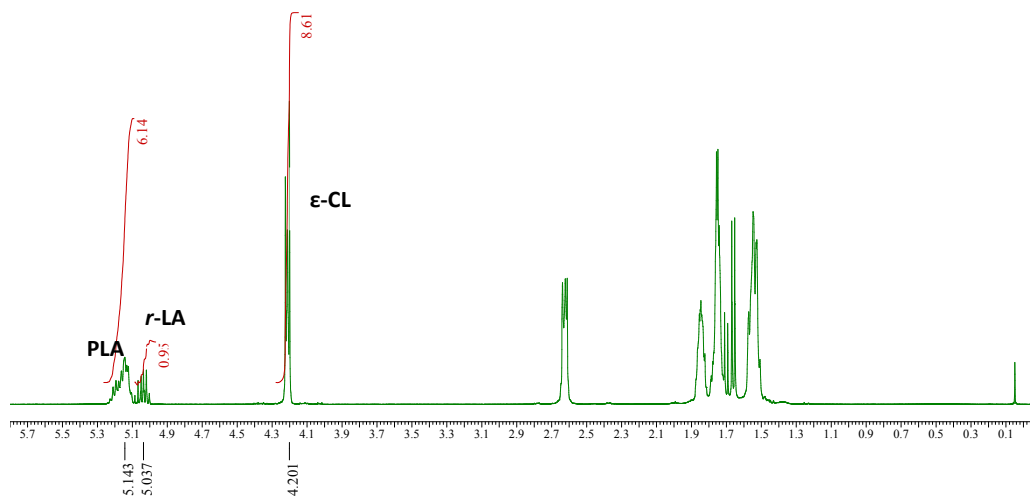

**Figure S16.**  $^1\text{H}$  NMR ( $\text{CDCl}_3$ , 400 MHz, 298 K)

spectrum of the crude reaction mixture of the attempted CL/LA copolymerization with **8** (Table 5, run 6) showing unreacted  $\epsilon$ -CL, 83% *r*-LA conversion.
